# Supplementary material for: Risk assessment of liquefaction-induced hazards using Bayesian network based on standard penetration test data
Source: Copernicus journal article supplement (doi:10.5194/nhess-2017-80), 2017-03-17
Supplement: Supplementary file [file nhess-2017-80-AC3-supplement.zip]

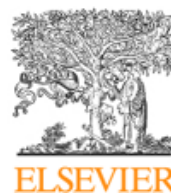

**Language Editing Services**

*Registered Office:*  
Elsevier Ltd  
The Boulevard, Langford Lane,  
Kidlington, OX5 1GB, UK.  
Registration No. 331566771

### **To whom it may concern**

The paper "Risk assessment of liquefaction-induced hazards using Bayesian network based on standard penetration test data" by Tang Xiaowei, Bai Xu, Qiu Jiangnan, Hu Jilei was edited by Elsevier Language Editing Services.

Kind regards,

**Elsevier Webshop Support**
